# Supplementary material for: A Liquid Biopsy-Based Multi-methylation Marker Panel for Non-invasive Gastric Cancer Screening
Source: Research Square preprint supplement (doi:10.21203/rs.3.rs-7372115/v1), 2025-09-17
Supplement: Supplementary file 1 [file 3c75c1bd67151ccc2b54efbb.docx]

**Table S2** Characteristics of controls in the model development and validation cohorts.

| Subject characteristics | Training set  Controls (n=346) | Validation set  Controls (n=79) |
| --- | --- | --- |
| Asymptomatic  healthy subjects | 117(33.8%) | 32(40.5%) |
| Chronic non-atrophic  gastritis | 131(37.9%) | 25(31.6%) |
| Chronic atrophic  gastritis | 32(9.2%) | 6(7.6%) |
| Enteric metaplasia | 33(9.5%) | 9(11.4%) |
| Gastric intraepithelial  neoplasia | 21(6.1%) | 3(3.8%) |
| Benign tumors of  the stomach | 12(3.5%) | 4(5.1%) |
