# Supplementary material for: A Liquid Biopsy-Based Multi-methylation Marker Panel for Non-invasive Gastric Cancer Screening
Source: Research Square preprint supplement (doi:10.21203/rs.3.rs-7372115/v1), 2025-09-17
Supplement: Supplementary file 2 [file bd5f2656ea7c365d47e4ee27.docx]

**Table S1** Primers and probes for PCR

| Gene (IlmnID) | Primer/Probe | Sequence |
| --- | --- | --- |
| SEPTIN9 (cg20275528) | SEPTIN9-F | GCGGGAACCTGATCCGCCCGGGAGGCGGGG |
| SEPTIN9-R | CCTGGCTCAGCTGAATGAATGGGGGAGG |
| SEPTIN9-P | AGGGGCCGGCGCCCGCCTTC |
| ZNF671 (cg12074025) | ZNF671-F | GCAGGTGGAGGTGTTGGGAAA |
| ZNF671-R | CTCCGCCATAGGACCGTGG |
| ZNF671-P | AGGAGATGTTGTCCCCAGTGTCCC |
| ELMO1 (cg19118812) | ELMO1-F | GAGACACTTTTGTTTCCTCCCTGG |
| ELMO1-R | CTCAGACTTCCCCAACTGCAGA |
| ELMO1-P | CGCAGCCCTCACCCTGCCGA |
| NPY (cg25884711) | NPY-F | GCCCGCGAACTTGCTAGAGA |
| NPY-R | GAGGGCTGGTCCGCGTCG |
| NPY-P | CCGGCATAGTCCGCTGGGGAGTGG |
| FGF12 (cg23207710) | FGF12-F | GCCCTCCGGCTTGCGCT |
| FGF12-R | TAACCTTGTGAGCGCCGGGT |
| FGF12-P | AGGGCAGGACCTGGGCGGCC |
| KCNA3 (cg11595545) | KCNA3-F | CCGCGATGCTCTGTCTGGGT |
| KCNA3-R | GCGCGGTGGGCGGGAAT |
| KCNA3-P | CGCGGTCAGCCGGGCTCCC |
| RUBCNL (cg23833588) | RUBCNL -F | GATGGAAGAAACTCTGGAGATGCG |
| RUBCNL -R | CTAGGAGGACCGGCAGAGGC |
| RUBCNL-P | AGGTGCGTGGTGCTGGGCCC |
| KCNMA1 (cg03354113) | KCNMA1-F | ATGGATAATCGGCCCCCTCCG |
| KCNMA1-R | CGCACTGGCGCGGCG |
| KCNMA1-P | CGCAGCCGGGGGAGGAGGGC |
| ADHFE1 (cg01588438) | ADHFE1-F | TTCAAGGGTGGATGGTGCGA |
| ADHFE1-R | CCTGCCCACCCGCTTCG |
| ADHFE1-P | CTGGGGCAGCTGGCGTTCTGGT |
| CHFR (cg04044684) | CHFR-F | GAGTCTGTGCGGTTTGGAGGAA |
| CHFR-F | TTCCAAAGCACTTAGATTACAGGCG |
| CHFR-P | TCTGCACTCATGAGGAGCCCCCAAG |
| CLDN11 (cg21389743) | CLDN11-F | GGAATTGTTTTACTTTGCATCGCC |
| CLDN11-R | GGAAGCGTGAAGGGGAGCA |
| CLDN11-P | CTGCGGACGGGGTGGGGC |
| FMN2 (cg25208017) | FMN2-F | CAGGTGATGCTTTGCACGAAGG |
| FMN2-R | CCCTTGCCGTGCTTGCCTA |
| FMN2-P | CTTGCCCCCGCTCCCCTTCTTTG |
| HOXB13 (cg09000583) | HOXB13-F | GAACCGAAGCTCCGAGCAGC |
| HOXB13-R | CGGGGTTTCTAGGAGAGCTGGC |
| HOXB13-P | AGGGAAATGTCCTCGAGGTAGTGGCG |
| IRF4 (cg21277995) | IRF4-F | AGGCGGAGAGTTCGGCATGA |
| IRF4-R | TTCTCCTCGTTCTCCCACACCAG |
| IRF4-P | TGAGCTGCGGCAACGGGAAGCT |
| ITGA4 (cg20415809) | ITGA4-F | CGCAGTCCCACTCCCCGA |
| ITGA4-R | CGGAGCTGTGTGACCCCAAAC |
| ITGA4-P | CCCTCGCTGTGACCGCCCAGC |
| RASSF2 (cg07994622) | RASSF2-F | GCAGGAACCGTGGAGTTGGAA |
| RASSF2-R | GCCTGCCCAGCCTGGCT |
| RASSF2-P | CCGATCGCTGGCCGAGGCG |
| RECK (cg13392078) | RECK-F | TGCGGGAGGCCGAAGGAT |
| RECK-R | CGAACCAAAGGGGCTTCTCTC |
| RECK-P | ATGCTTTCTTTGGGTGCGAGGCAGC |
| RPRM (cg00522056) | RPRM-F | GAACAGGTGCCGGGCTGA |
| RPRM-R | GAGCCTAGCTGCTGCGCG |
| RPRM-P | CTCACTCGCAGACTAGCGCGTGCG |
| SGCE (cg04010684) | SGCE-F | GTTTTAAATTGGTTTTGGTTTCTGGA |
| SGCE-R | CTGGGAGCTAAACAGGGCGT |
| SGCE-P | ACTCGGTACGGCAGCATCTCTGGC |
| SHISA3 (cg14866200) | SHISA3-F | CAGCCCCAGCAACTGCCTCT |
| SHISA3-R | GGGCTGCACTACGAGTTCCG |
| SHISA3-P | CCCGCAGGCCCTCGCCAACT |
| SNCA (cg14346243) | SNCA-F | CCCTCAGCTATCTACCCTGAGCAG |
| SNCA-R | GGTGGTAACGGGTTAACAAGTGCT |
| SNCA-P | TCCGCTAGGGTGGAGGCTGAGAACG |
| TFPI2 (cg20230721) | TFPI2-F | AGCGAGTCCCCCCTGCCA |
| TFPI2-R | TCCAGGAGCTTCTCTCCCCAAC |
| TFPI2-P | ACCTGGAGAAAGCGAGGCTTGGAGG |
| TWIST1 (cg24446548) | TWIST1-F | GCCCCGAGGTCCAAAAAGAA |
| TWIST1-R | TCTCGCCCAACTCCCAGACAC |
| TWIST1-P | CGTTTCCAGGAGGCCTGGCGG |
| VIM (cg12874092) | VIM-F | CCTCCTACCGCAGGATGTTCG |
| VIM-R | AGAGGCTGCGGCTGGTGCT |
| VIM-P | CAGGCTGTAGGTGCGGGTGGACG |
| ZNF331 (cg07952047) | ZNF331-F | CCCTTCCAGATACGTCGATTCC |
| ZNF331-R | AAATCCACAGAGTTGGAAGCGG |
| ZNF331-P | ATTTCCCAGAAGCCCTCAAGGCAGG |
| β-Actin | Actin-F | GTTGTTACAGGAAGTCCCTTGCC |
| Actin-R | GCAATGCTATCACCTCCCCTGTG |
| Actin-P | CTTGGGAGAGGACTGGGCCATTCTCC |
